# Supplementary material for: Mycobacterium tuberculosis exploits host ATM kinase for survival advantage through SecA2 secretome
Source: eLife. 2020 Mar 30;9:e51466. doi: 10.7554/eLife.51466 (PMC7162654; doi:10.7554/eLife.51466)
Supplement: Figure 3—source data 1. — Source data for Figure 3b. [file elife-51466-fig3-data1.xlsx]

## Sheet: Sheet1
		Figure 3: Source Data 1
				CFU/mL				CFU/mL				CFU/mL				CFU/mL
		Fig 3b		0 hpi	Average	SD	ttest	24 hpi	Average	SD	ttest	48 hpi	Average	SD	ttest	72 hpi	Average	SD	ttest
			Rv	60000	56666.7	5773.5		80000	80000	10000		190000	173333	28867.5		180000	136667	45092.5
				50000				70000				190000				90000
				60000				90000				140000				140000
			RV+Inh	60000	63333.3	5773.5	0.2302	5000	3333.33	2081.67	0.000202017	0	0	0	0.000482739	0	0	0	0.00629929
				70000				4000				0				0
				60000				1000				0				0
