# Supplementary material for: Mycobacterium tuberculosis exploits host ATM kinase for survival advantage through SecA2 secretome
Source: eLife. 2020 Mar 30;9:e51466. doi: 10.7554/eLife.51466 (PMC7162654; doi:10.7554/eLife.51466)
Supplement: Figure 5—source data 1. — Source Data for Figure 5c and e. [file elife-51466-fig5-data1.xlsx]

## Sheet: Sheet1
	Figure 5: Source Data 1
	Fig 5c		0 hpi						24 hpi						48 hpi
			CFU/mL			average	stdev	ttest	CFU/mL			average	stdev	ttest	CFU/mL			average	stdev	ttest
		Rv	350000	300000	320000	323333	25166.1		190000	180000	192000	187333	6429.1		80000	78000	85000	81000	3605.55
		Rv + DMSO	340000	360000	310000	336667	25166.1	0.551786	180000	190000	210000	193333	15275.3	0.564633	80000	74000	72000	75333.3	4163.33	0.149321
		Rv + 1uM KU	360000	300000	330000	330000	30000	0.782754	110000	95000	100000	101667	7637.63	0.000119335	35000	31000	29000	31666.7	3055.05	5.5011e-05
		Rv + 5uM KU	290000	320000	400000	336667	56862.4	0.729182	50000	45000	48000	47666.7	2516.61	3.95925e-06	10000	8000	6000	8000	2000	6.73663e-06
		Rv + 10uM KU	200000	220000	240000	220000	20000	0.00509754	13000	15000	18000	15333.3	2516.61	1.72453e-06	3000	1000	2000	2000	1000	3.33806e-06
			0 hpi						24 hpi						48 hpi
	Fig 5e		CFU/mL			average	stdev	ttest	CFU/mL			average	stdev	ttest	CFU/mL			average	stdev	ttest
		Rv	170000	195000	140000	168333	27537.9		88000	110000	90000	96000	12165.5		90000	84000	66000	80000	12490
		Rv + DMSO	160000	120000	180000	153333	30550.5	0.561899	90000	100000	102000	97333.3	6429.1	0.874856	62000	96000	75000	77666.7	17156.1	0.858235
		Rv + KU	150000	136000	163000	149667	13503.1	0.351271	10000	20000	15000	15000	5000	0.000437555	8000	5000	4000	5666.67	2081.67	0.000526895
		Rv + Chk2-I	136000	140000	158000	144667	11718.9	0.242638	102000	110000	99000	103667	5686.24	0.378716	90000	110000	79000	93000	15716.2	0.324798
