# Supplementary material for: Mycobacterium tuberculosis exploits host ATM kinase for survival advantage through SecA2 secretome
Source: eLife. 2020 Mar 30;9:e51466. doi: 10.7554/eLife.51466 (PMC7162654; doi:10.7554/eLife.51466)
Supplement: Figure 6—source data 1. — Source Data for Figure 6c, f and g. [file elife-51466-fig6-data1.xlsx]

## Sheet: Sheet1
Figure 6: Source Data 1
Fig 6c		0 hpi						24 hpi						48 hpi
		CFU/mL			average	stdev	ttest	CFU/mL			average	stdev	ttest	CFU/mL			average	stdev	ttest
	Rv	115000	113000	116000	114667	1527.53		16800	19100	17100	17666.7	1250.33		12600	13100	11900	12533.3	602.771
	Rv + DMSO	110000	97000	130000	112333	16623.3	0.820609	18100	17300	16800	17400	655.744	0.759963	11000	11900	13600	12166.7	1320.35	0.684296
	Rv + KU	95000	98000	121000	104667	14224.4	0.292652	6100	5900	4200	5400	1044.03	0.000199415	2200	3800	2100	2700	953.939	0.000112302
	Rv + NU	136000	109000	119000	121333	13650.4	0.447853	18900	17600	17500	18000	781.025	0.7153	12100	12900	13400	12800	655.744	0.631431
	Rv + VE	126000	130000	119000	125000	5567.76	0.0362211	19500	18800	18100	18800	700	0.24258	12100	13900	14200	13400	1135.78	0.30788
		0 hpi						24 hpi						48 hpi
Fig 6f		CFU/mL			average	stdev	ttest	CFU/mL			average	stdev	ttest	CFU/mL			average	stdev	ttest
	Rv	750000	800000	820000	790000	36055.5		200000	300000	450000	316667	125831		300000	320000	250000	290000	36055.5
	Rv+KU	500000	470000	400000	456667	51316	0.000773571	50000	30000	40000	40000	10000	0.0191641	7000	8000	8000	7666.67	577.35	0.000171154
	Rv + AKT-I	480000	500000	400000	460000	52915	0.000870827	60000	20000	40000	40000	20000	0.0197562	2000	2000	1000	1666.67	577.35	0.000157577
	Rv + KU + AKT-I	310000	300000	280000	296667	15275.3	2.60954e-05	20000	30000	20000	23333.3	5773.5	0.0156884	1000	1000	0	666.667	577.35	0.000155446
Fig 6g
		Early Apoptotic	average	sd	ttest	Late Apoptotic	average	sd	ttest	Live Cells	average	sd	ttest
	UI +DMSO	0.11	0.18	0.07		3.04	3.06667	0.132035		96.85	96.7533	0.126623
		0.25				2.95				96.8
		0.18				3.21				96.61
	UI +KU	0.11	3.19	3.2012		4	3.26333	0.761074		95.9	93.55	2.44497
		6.5				2.48				91.02
		2.96				3.31				93.73
	UI +AKTi	0.18	3.54	2.9731		3.21	2.59333	0.572043		96.61	93.87	2.5106
		4.61				2.08				93.32
		5.83				2.49				91.68
	UI +KU+AKTi	3.73	2.93	2.47879		3.02	3.55667	1.05311		93.25	93.5133	3.33281
		4.91				4.77				90.32
		0.15				2.88				96.97
	Rv	5.15	4.69667	0.785196		7.16	7.76667	0.948754		87.69	87.54	0.173494	0.0362168
		3.79				8.86				87.35
		5.15				7.28				87.58
	Rv +KU	10.75	10.6267	0.831885	0.000851521	12.51	14.69	2.64326	0.0129508	76.74	74.6767	3.21693	0.00229376
		11.39				17.63				70.97
		9.74				13.93				76.32
	Rv+AKTinh	10.86	11.3733	1.48796	0.00234689	11.39	15.8933	3.92645	0.0252467	78.05	72.8367	4.6179	0.00529007
		10.21				18.6				71.2
		13.05				17.69				69.26
	Rv+KU+AKTinh	11.71	11.12	2.79215	0.0185261	19.92	18.2633	2.11576	0.00142898	68.37	70.6133	4.71396	0.00341095
		13.57				18.99				67.44
		8.08				15.88				76.03
