# Supplementary material for: Mycobacterium tuberculosis exploits host ATM kinase for survival advantage through SecA2 secretome
Source: eLife. 2020 Mar 30;9:e51466. doi: 10.7554/eLife.51466 (PMC7162654; doi:10.7554/eLife.51466)
Supplement: Figure 7—source data 1. — Source Data for Figure 7a, c, e and f. [file elife-51466-fig7-data1.xlsx]

## Sheet: Sheet1
Figure 7: Source Data 1
		Fig 7a		H37Rv CFU/lung
				L1	L2	L3	L4	L5	stdev
			Day 1	40	80	80	40		23.094
			Day 56	36000	52000	33200	68000	44000	16094.3
				H37Rv CFU /spleen					stdev
				S1	S2	S3	S4	S5
			Day 56	1000	2000	3000	2000	4000	1140.18
		Fig 7c
			24h post inh treatment			CFU			average	stdev	ttest
			Rv			1200000	900000	1100000	1.06667e+06	152753
			Rv +KU			1000000	950000	1000000	983333	28867.5	0.405715
			Rv+Inh			900000	1000000	980000	960000	52915	0.316855
			Rv+ Inh+KU			900000	820000	780000	833333	61101	0.0699528
			48h post inh treatment			CFU			average	stdev	ttest
			Rv			91000	100000	80000	90333.3	10016.7
			Rv +KU			40000	35000	50000	41666.7	7637.63	0.00259367
			Rv+Inh			30000	10000	15000	18333.3	10408.3	0.000989927
			Rv+ Inh+KU			10000	5000	6000	7000	2645.75	0.000153933
			72h post inh treatment			CFU			average	stdev	ttest
			Rv			15000	10000	18000	14333.3	4041.45
			Rv +KU			7100	7900	8000	7666.67	493.288	0.0470534
			Rv+Inh			4800	4000	2700	3833.33	1059.87	0.0121304
			Rv+ Inh+KU			1700	1000	1200	1300	360.555	0.0051113
	Fig 7e				CFU/lung
			Lungs	L1	L2	L3	L4	L5	L6	stdev	ttest
		Day 1	Rv	50	62	56	72	40		12.083
		Day 15	Rv	104000	80000	110000	130000	86000	106000	19949.9
		Day30	Rv	276000	300000	196000	286000	232000	266000	42988.4
			Rv+Vehicle	286000	188000	334000	316000	220000	194000	62619.5
			Rv+INH	160000	192000	152000	220000	166000	188000	27856.8	0.0209316
			Rv+KU	9200	6600	7600	9600	3800	9200	2329.81	2.43746e-06
			Rv+INH+Ku	1800	1400	600	1200	800	400	477.493	1.90762e-06	8.684e-09
					CFU/spleen
	Fig 7f		Spleen	S1	S2	S3	S4	S5	S6	stdev
		Day 15	Rv	880	620	520	780	360	660	184.788
		Day30	Rv	1460	960	1180	1380	680	900	300.044
			Rv+Vehicle	1140	820	1560	920	620	740	339.804
			Rv+INH	760	600	500	960	680	520	172.395	0.0856091
			Rv+KU	400	320	620	540	260	380	135.647	0.00439025
			Rv+INH+Ku	40	40	20	20	20	60	16.3299	5.23162e-05	4.11403e-06
